# Supplementary material for: Potential Antioxidative Components in Azadirachta indica Revealed by Bio-Affinity Ultrafiltration with SOD and XOD
Source: MDPI journal article supplement (doi:10.3390/antiox11040658), 2022-03-29
Supplement: s1 [file s1]

## Supplementary materials

Mingquan GUO

Professor of Medicinal Chemical Biology

Wuhan Botanical Garden, Chinese Academy of Sciences

Email: guomq@wbgcas.cn

TEL./FAX.: +86-(027)87700850

March 22, 2022

# Potential Antioxidative Components in *Azadirachta indica* Revealed by Bio-affinity Ultrafiltration with SOD and XOD

Minxia Fan <sup>1,2,3</sup>, Guilin Chen <sup>1,2,3</sup>, and Mingquan Guo <sup>1,2,3,\*</sup>

<sup>1</sup> Key Laboratory of Plant Germplasm Enhancement and Specialty Agriculture, Wuhan Botanical Garden, Chinese Academy of Sciences, Wuhan 430074, China; fanminxia@wbgcas.cn (M.-X.F.); glchen@wbgcas.cn (G.-L.C.)

<sup>2</sup> Sino-Africa Joint Research Center, Chinese Academy of Sciences, Wuhan 430074, China

<sup>3</sup> Innovation Academy for Drug Discovery and Development, Chinese Academy of Sciences, Shanghai 201203, China

\* Correspondence: guomq@wbgcas.cn; Tel.: +86-027-87700850

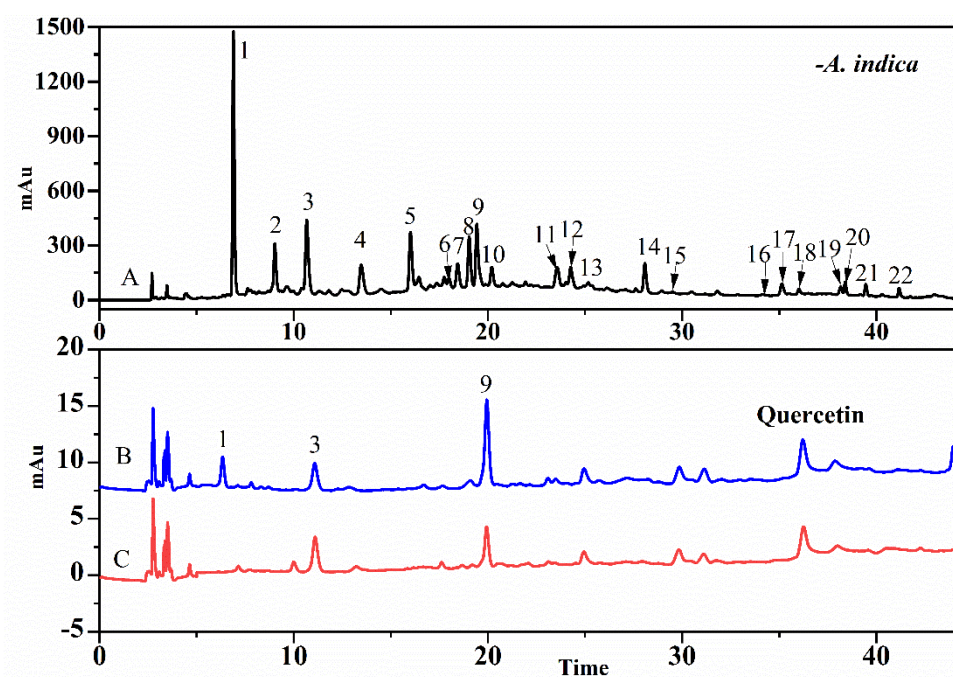

**Figure S1.** The UF-LC-MS of the potential ligands of SOD. Line A: *A. indica*; Line B: UF-LC-MS of Gallic acid+Protocatechuic acid+(-)-Epicatechin+Quercetin with active SOD; Line C: UF-LC-MS of Gallic acid+Protocatechuic acid+(-)-Epicatechin+Quercetin with inactive SOD; 280nm

**Table S1.** The relative binding affinity (RBA) and the relative IC<sub>50</sub> data of potential SOD ligands in *A. indica*.

| No.       | Identification      | RBA   | IC <sub>50</sub> (mM) |
|-----------|---------------------|-------|-----------------------|
|           |                     | SOD   |                       |
| 1         | Gallic acid         | 0.084 | 3.15                  |
| 3         | Protocatechuic acid | 0.84  | 0.32                  |
| 9         | (-)-Epicatechin     | 0.34  | 0.79                  |
| Quercetin |                     | 0.46  | 0.58                  |

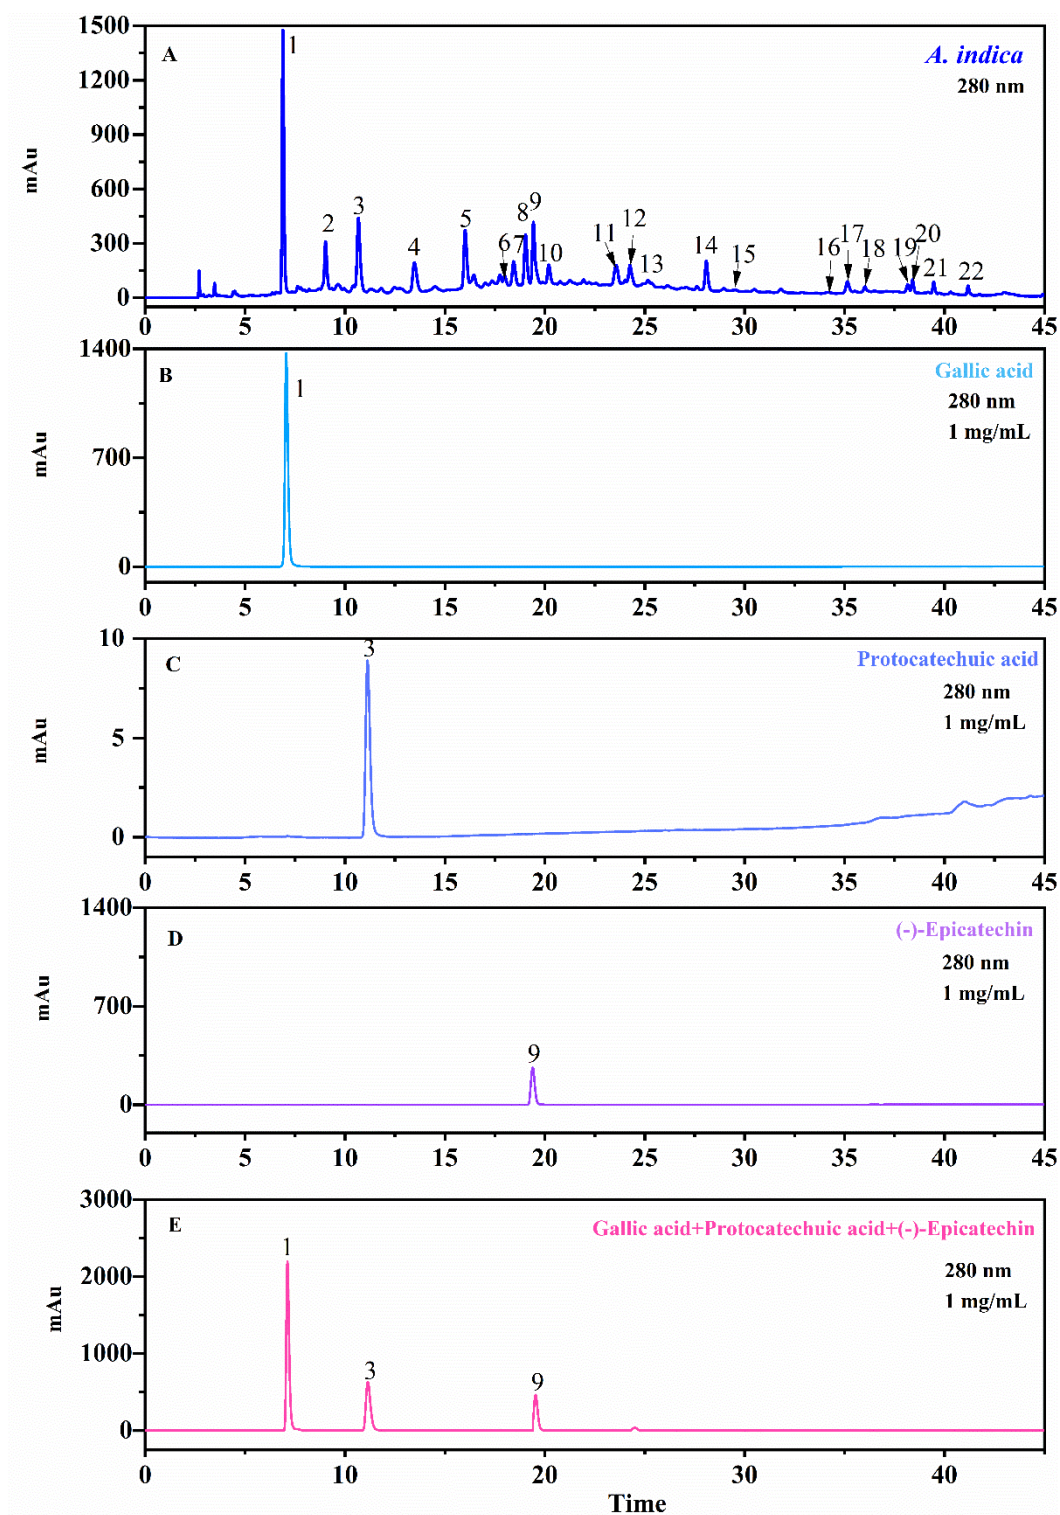

**Figure S2.** The HPLC of the potential ligands of SOD. A: *A. indica*; B: Gallic acid; C: Protocatechuic acid; D: (-)-Epicatechin; E: Gallic acid+Protocatechuic acid+(-)-Epicatechin

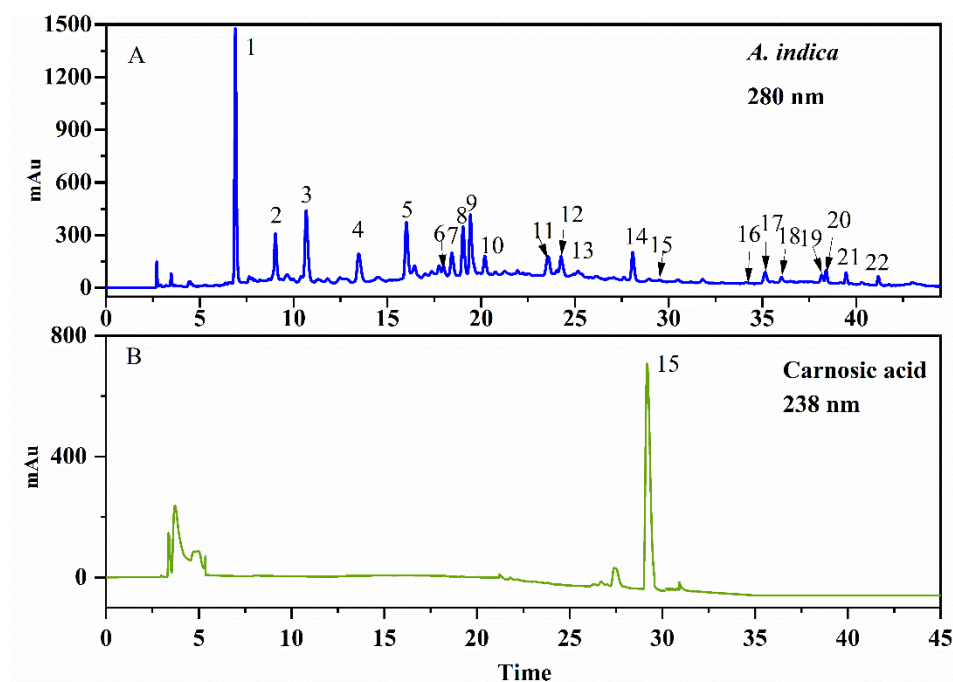

Figure S3. The HPLC of the potential ligands of XOD. A: *A. indica*; B: Carnosic acid.

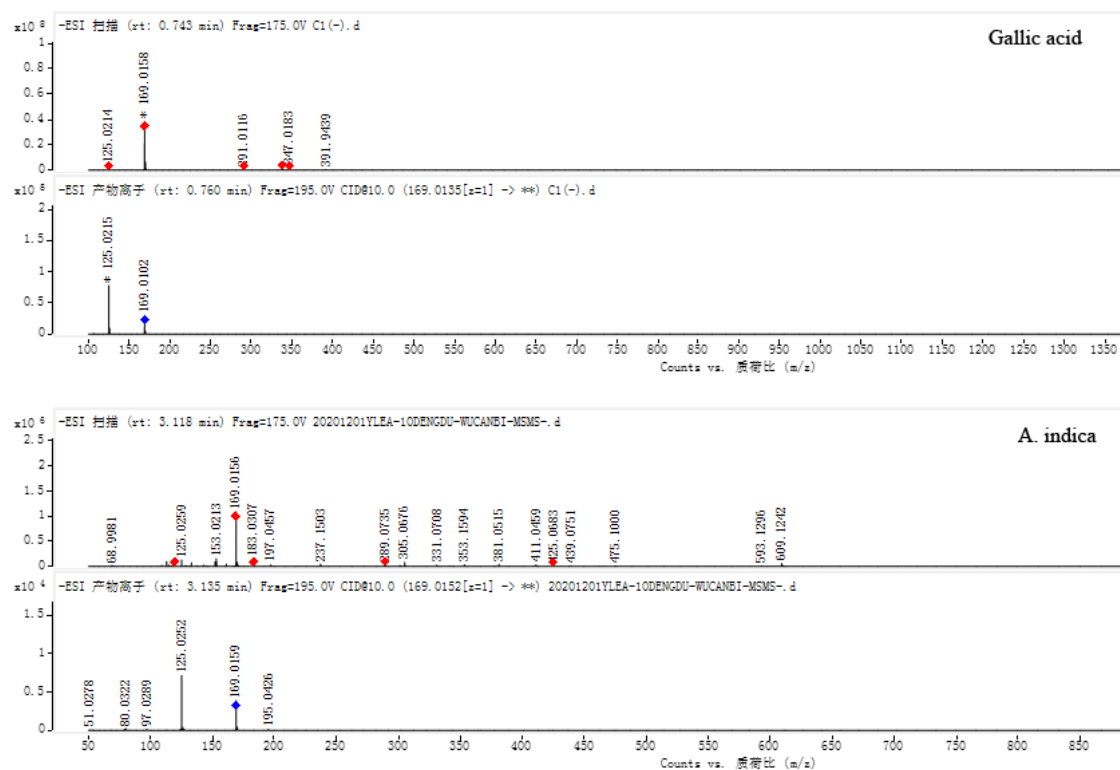

Figure S4. The mass spectrometry fragments of gallic acid in standard substance and *A. indica*.

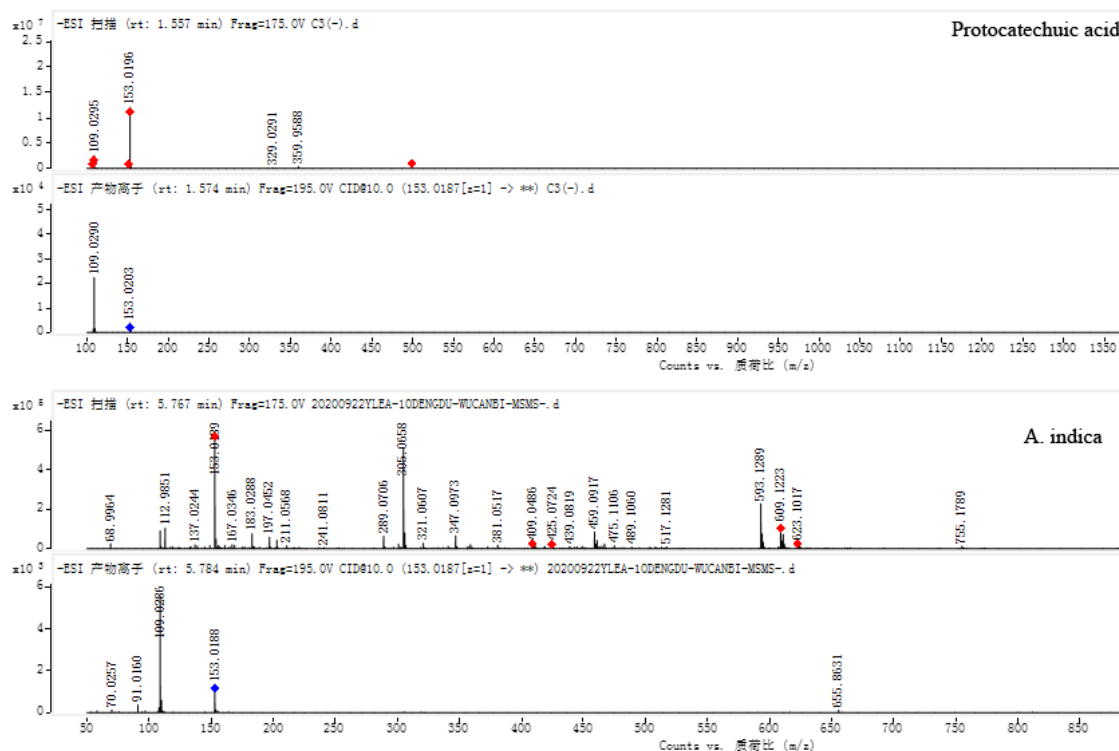

**Figure S5.** The mass spectrometry fragments of protocatechuic acid in standard substance and *A. indica*.

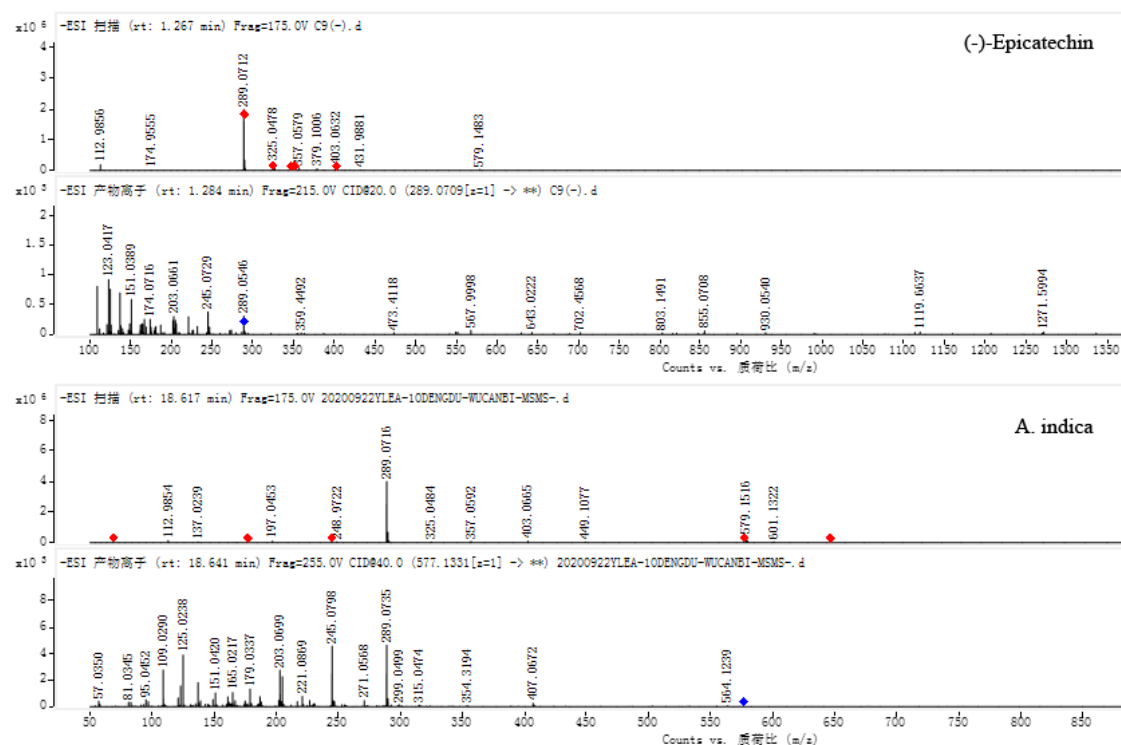

**Figure S6.** The mass spectrometry fragments of (-)-Epicatechin in standard substance and *A. indica*.

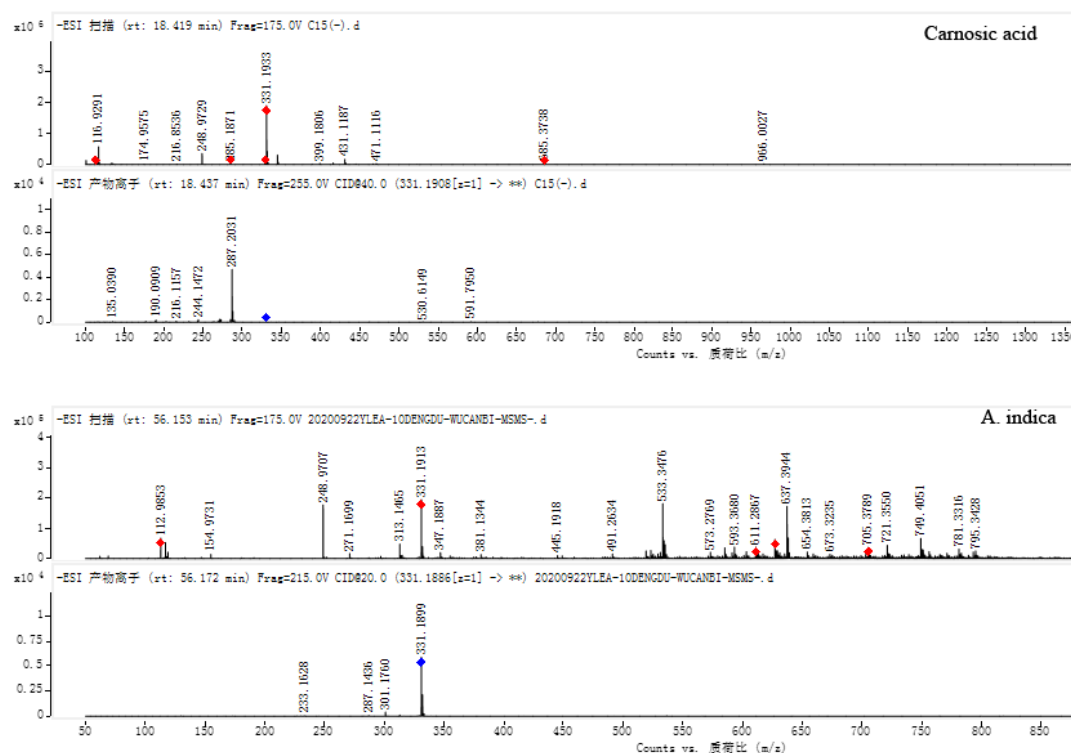

**Figure S7.** The mass spectrometry fragments of carnosic acid in standard substance and *A. indica*.
